# Supplementary material
Source: PubMed Central journal article supplement (PMC3805056)

**Supplementary Data**

**Supplemental Table 1. List of antibodies**

**Supplemental Fig. 1. DNMA1-GFP is expressed in cerebral vSMCs from SM22-Cre<sup>+</sup>/DNMA1<sup>+</sup> embryos.** Middle cerebral arteries of E13.5 control (A) and SM22-Cre<sup>+</sup>/DNMA1<sup>+</sup> (B) embryonic brains visualized with Dylight 594-lectin (red) (arrows). (C-H) In transverse sections above the level of the optic chiasm, anti-GFP (green) and lectin co-staining reveals expression and nuclear localization of DNMA1 in vSMCs from mutant (D, arrowheads) but not control vessels (C). DNMA1-GFP (green) expression co-localizes with SMC markers SMA (F) and NG-2 (H) in mutant arteries while GFP signal is undetectable in the control vessels (E and G). Nuclei identified by DAPI counterstain (blue). Scale bar: 10  $\mu$ m.

**Supplemental Fig. 2. Preserved EC proliferation in perineural vessels of SM22-Cre<sup>+</sup>/DNMA1<sup>+</sup> embryos.**

Ki67 antibody reactivity (green) identifies proliferating lectin-positive ECs (red) in the perineural regions (arrowheads) of E9.5 (A-D), E11.5 (E-H), E13.5 (I and J) and E15.5 (K and L) embryos. Cartoon inserts in A, E, I, and K illustrate the orientation of the region of interest: (A-D) sagittal plane, midline; (E-H) transverse plane; (I-L) coronal plane. (M) Quantification of Ki67<sup>+</sup>Lectin<sup>+</sup> cell counts normalized to controls for each stage. Data represent mean $\pm$ SEM percentage of cell numbers per high power field normalized to controls (N=6 sections per embryo, N=3 embryos per stage,  $p>0.05$  at all stages). Nuclei identified by DAPI counterstain (blue). Scale bars: 50  $\mu$ m in A, B, E and F and 10  $\mu$ m in C, D, G, H and I-L).

**Supplemental Fig. 3. Absence of vSMC apoptosis in SM22-Cre<sup>+</sup>/DNMA1<sup>+</sup> embryos.**

(A-H) Cleaved Caspase 3 (C-Cas-3, green) signal does not co-localize with SMA-positive (red) vascular structures in E11.5, E13.5 and E15.5 embryos. Cartoon inserts in A, E and G illustrate plane of section for respective stages (A-D, transverse; E-H, coronal). Clusters of C-Cas-3 stained apoptotic cells appear only in non-vascular neuronal tissue in the developing cortical plate as well as in the ventral telencephalon of both control and mutant embryos (A, B and E, F, arrowheads). N=3 per group/stage. Scale bar: 10  $\mu$ m.

**Supplemental Fig. 4. Notch ligand and receptor expression within arterial segments of the anterior cW.**

Panels are representative sections containing ACA/ACoMA conduit assembly in E13.5 control, SM22-Cre<sup>-</sup>/DNMAML1<sup>+</sup> embryos. Immunoreactivity against Notch1 (A-C), Notch3 (D-F), and Jagged1 (G-I) is detected in SMCs as shown by co-localized expression with the smooth muscle specific marker,  $\alpha$ SMA. Notch ligand Dll4 expression co-localizes with the endothelial cell marker, CD31 (J-L). Panels C, F, I and L are merged images of panels A-B, D-E, G-H and J-K, respectively. Nuclei identified by DAPI counterstain (blue in merged panels). A representative cartoon insert (A) illustrates coronal plane at level of ACoMA. Scale bar: 10  $\mu$ m.

**Supplemental Table 1. List of antibodies**

| <b>Primary Antibody</b>               | <b>Source</b>             | <b>Cat#</b> | <b>Dilution</b> |
|---------------------------------------|---------------------------|-------------|-----------------|
| <b>Anti-alpha smooth muscle actin</b> | Sigma (Mouse)             | C6198       | 1:200           |
| <b>Anti-alpha smooth muscle actin</b> | Sigma (Mouse)             | F3777       | 1:200           |
| <b>Anti-CD31</b>                      | BD Pharmingen (Rat)       | 553370      | 1:50            |
| <b>Anti-Cleaved Caspase-3</b>         | Cell Signaling (Rabbit)   | 9661        | 1:200           |
| <b>Anti-Dll4</b>                      | R&D (Mouse)               | 1389        | 1:200           |
| <b>Anti-GFP</b>                       | Molecular Probes (Rabbit) | A11122      | 1:400           |
| <b>Anti-GFP</b>                       | Abcam(Goat)               | ab6673      | 1:400           |
| <b>Anti-Jagged1</b>                   | Santa Cruz (Rabbit)       | SC8303      | 1:100           |
| <b>Anti-Jagged1</b>                   | Santa Cruz (Goat)         | SC6011      | 1:100           |
| <b>Anti-Ki67</b>                      | Abcam (Rabbit)            | ab66155     | 1:100           |
| <b>Anti-NG2</b>                       | Millipore( Rabbit)        | AB5320      | 1:200           |
| <b>Anti-Notch1</b>                    | Santa Cruz (Goat)         | sc6014      | 1:400           |
| <b>Anti-Notch3</b>                    | Santa Cruz (Rabbit)       | sc32347     | 1:100           |
| <b>Anti-Pdgfr<math>\beta</math></b>   | Cell signaling (Rabbit)   | 3169        | 1:200           |
| <b>Anti-Vegfa</b>                     | Santa Cruz (Rabbit)       | sc152       | 1:100           |

  

| <b>Secondary Antibody and Lectin</b>                               | <b>Source</b>                   | <b>Cat#</b> | <b>Dilution</b> |
|--------------------------------------------------------------------|---------------------------------|-------------|-----------------|
| <b>Anti-Goat IgG DyLight 594</b>                                   | Jackson Immunoresearch (Donkey) | 705-585-003 | 1:200           |
| <b>Anti-rabbit IgG DyLight 488</b>                                 | Jackson Immunoresearch (Donkey) | 705-545-003 | 1:200           |
| <b>Biotinylated anti-rabbit IgG</b>                                | Vector Lab (Donkey)             | BA-1100     | 1:200           |
| <b>Streptavidin, Alexa Fluor® 350 conjugate</b>                    | Molecular Probes                | S-11249     | 1:200           |
| <b>DyLight 594 labeled Lycopersicon Esculentum (Tomato) Lectin</b> | Vector Lab                      | DL-1177     | 1:100           |

Supplemental Fig. 1

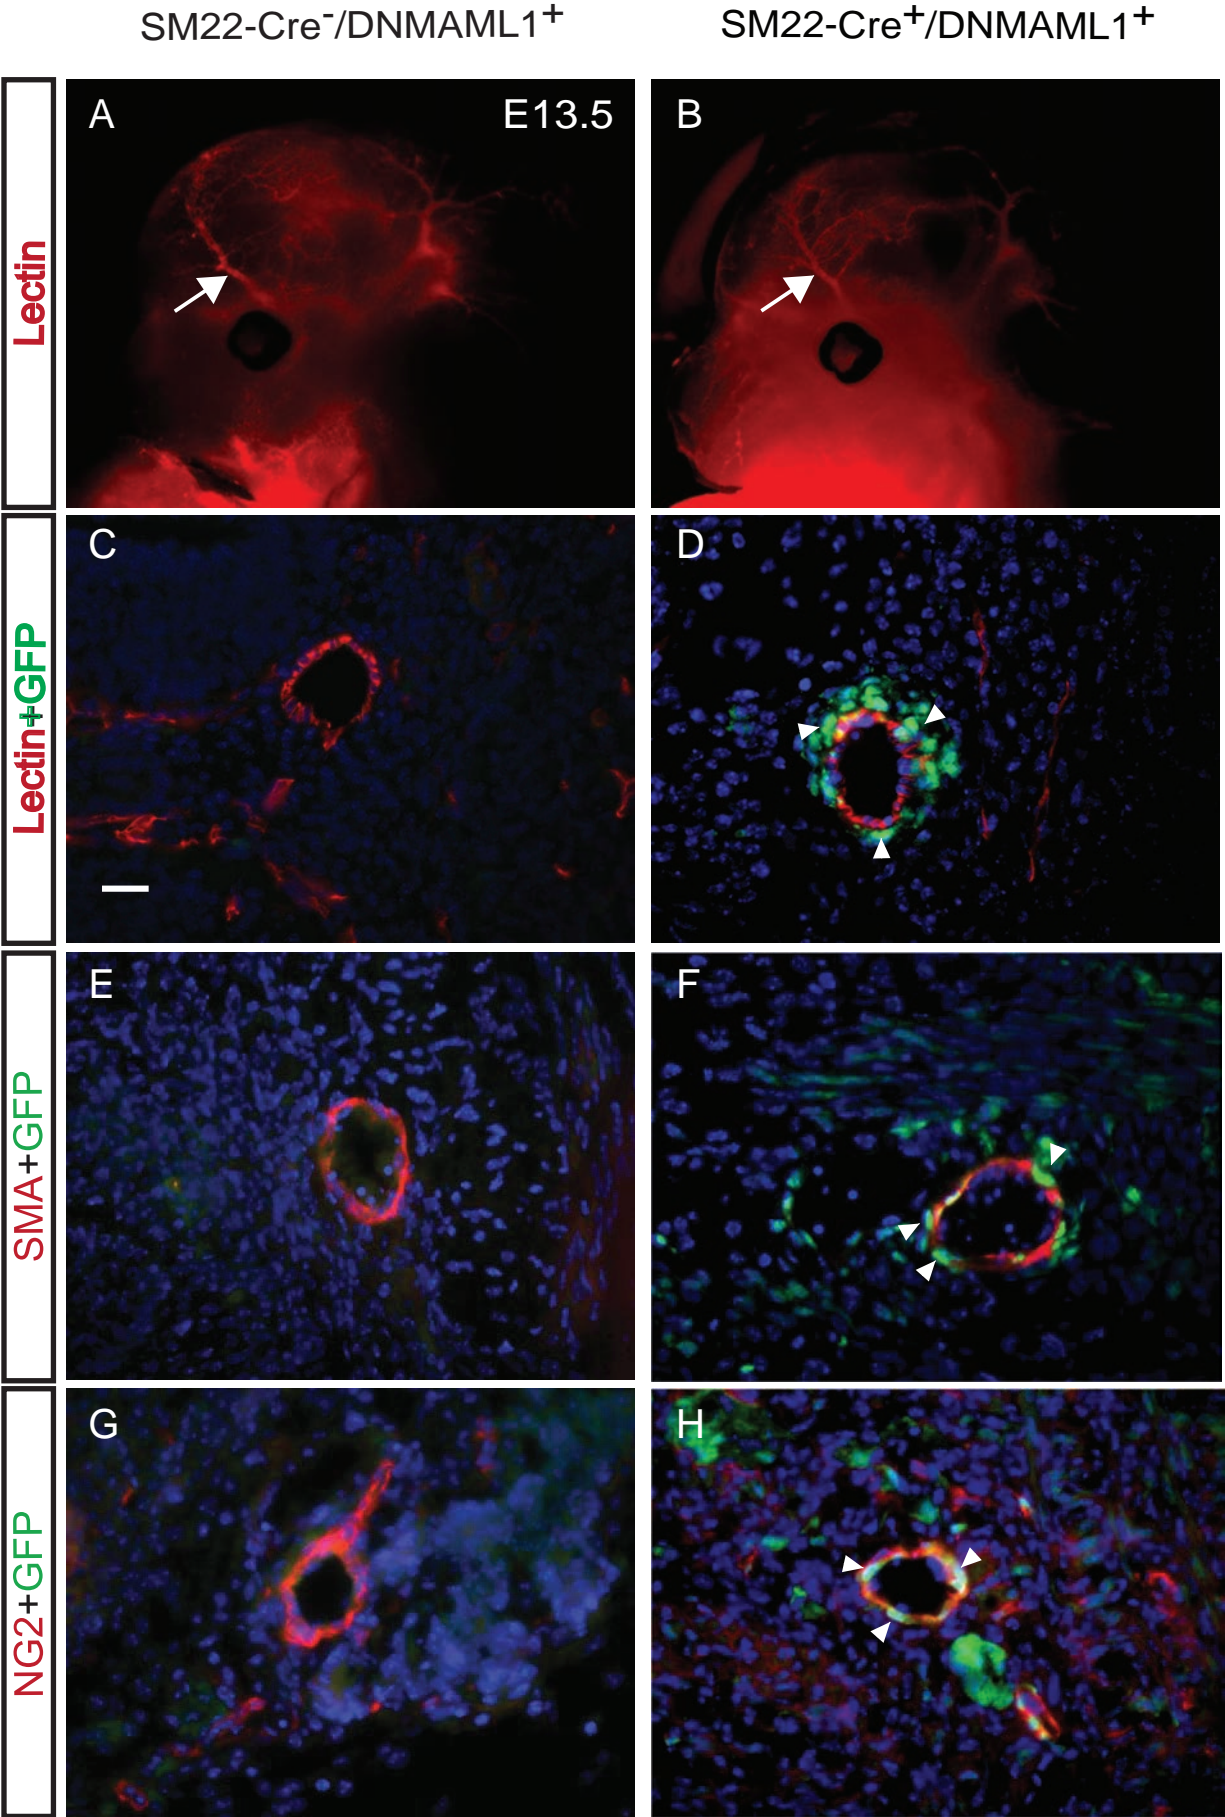



Supplemental Fig. 2

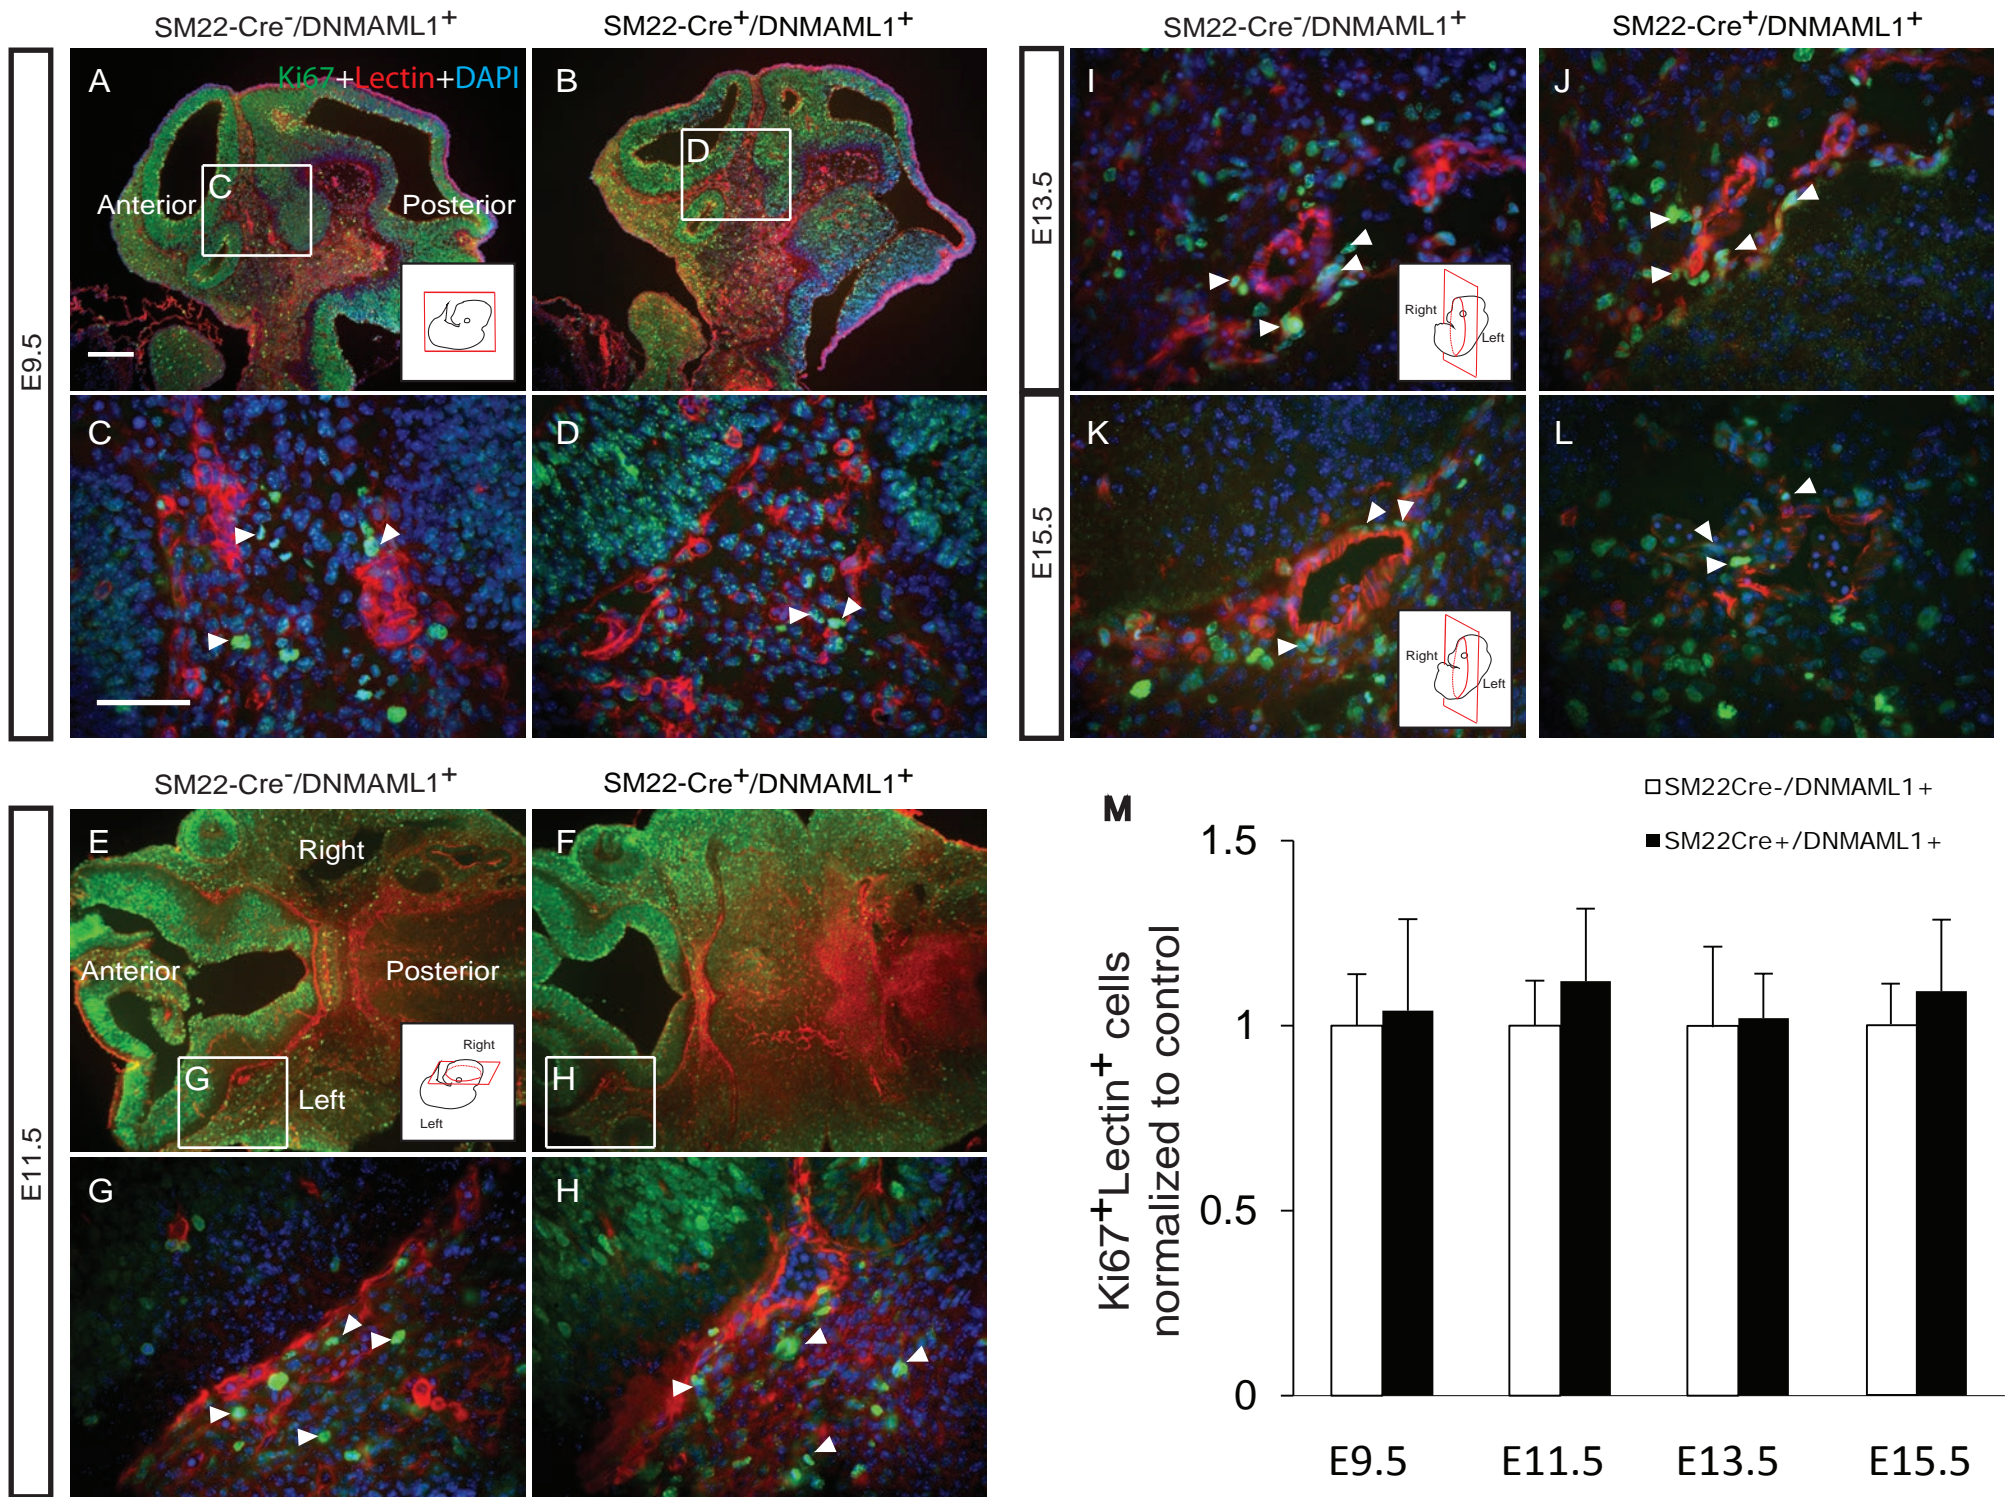



Supplemental Fig. 3

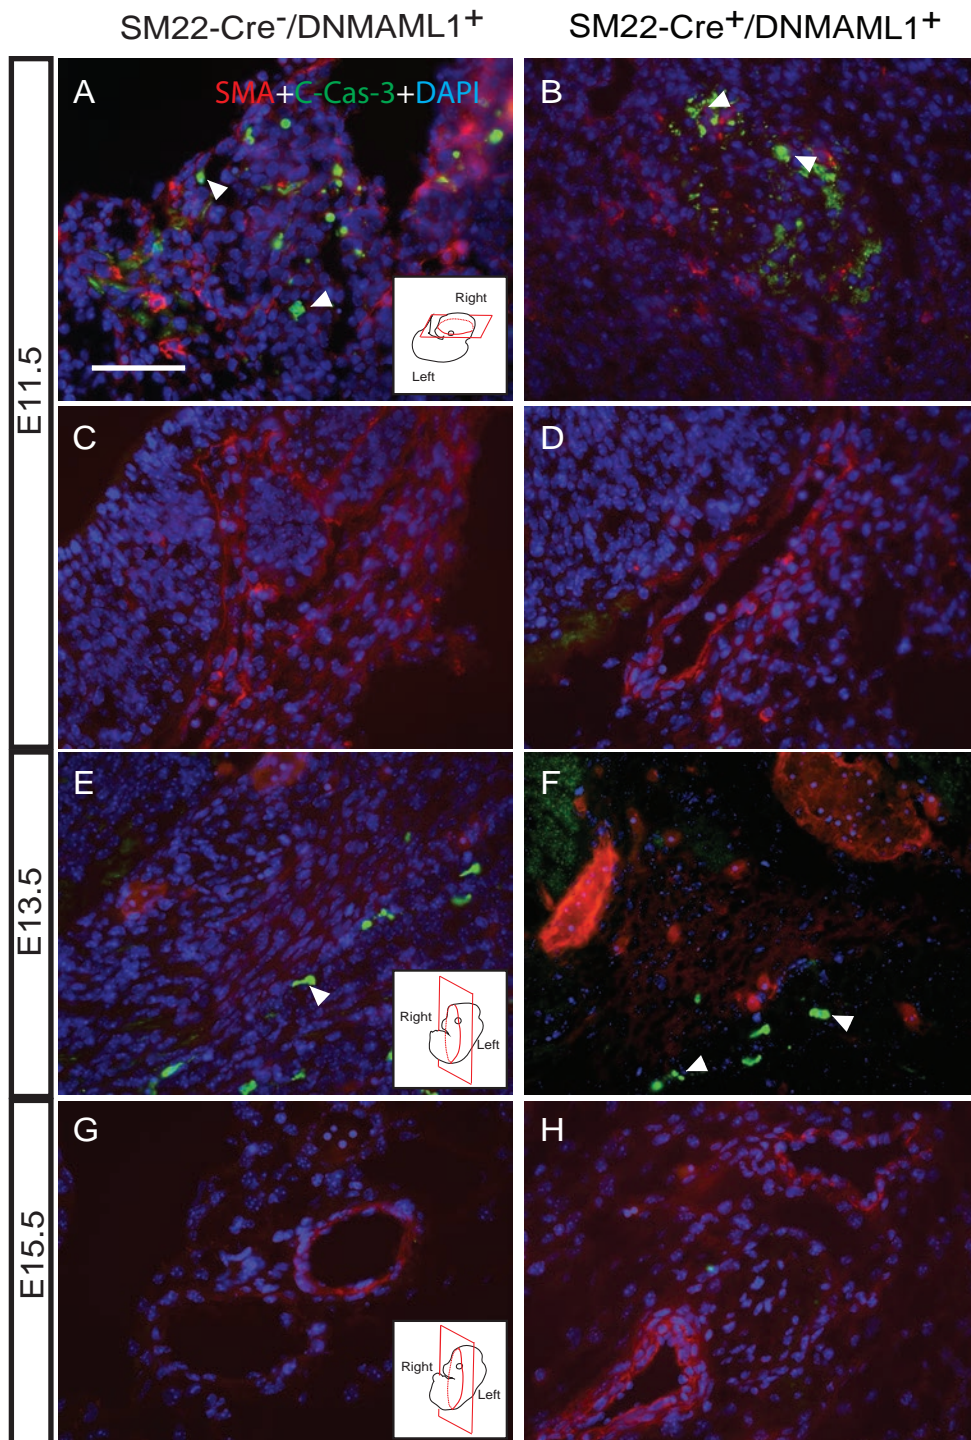

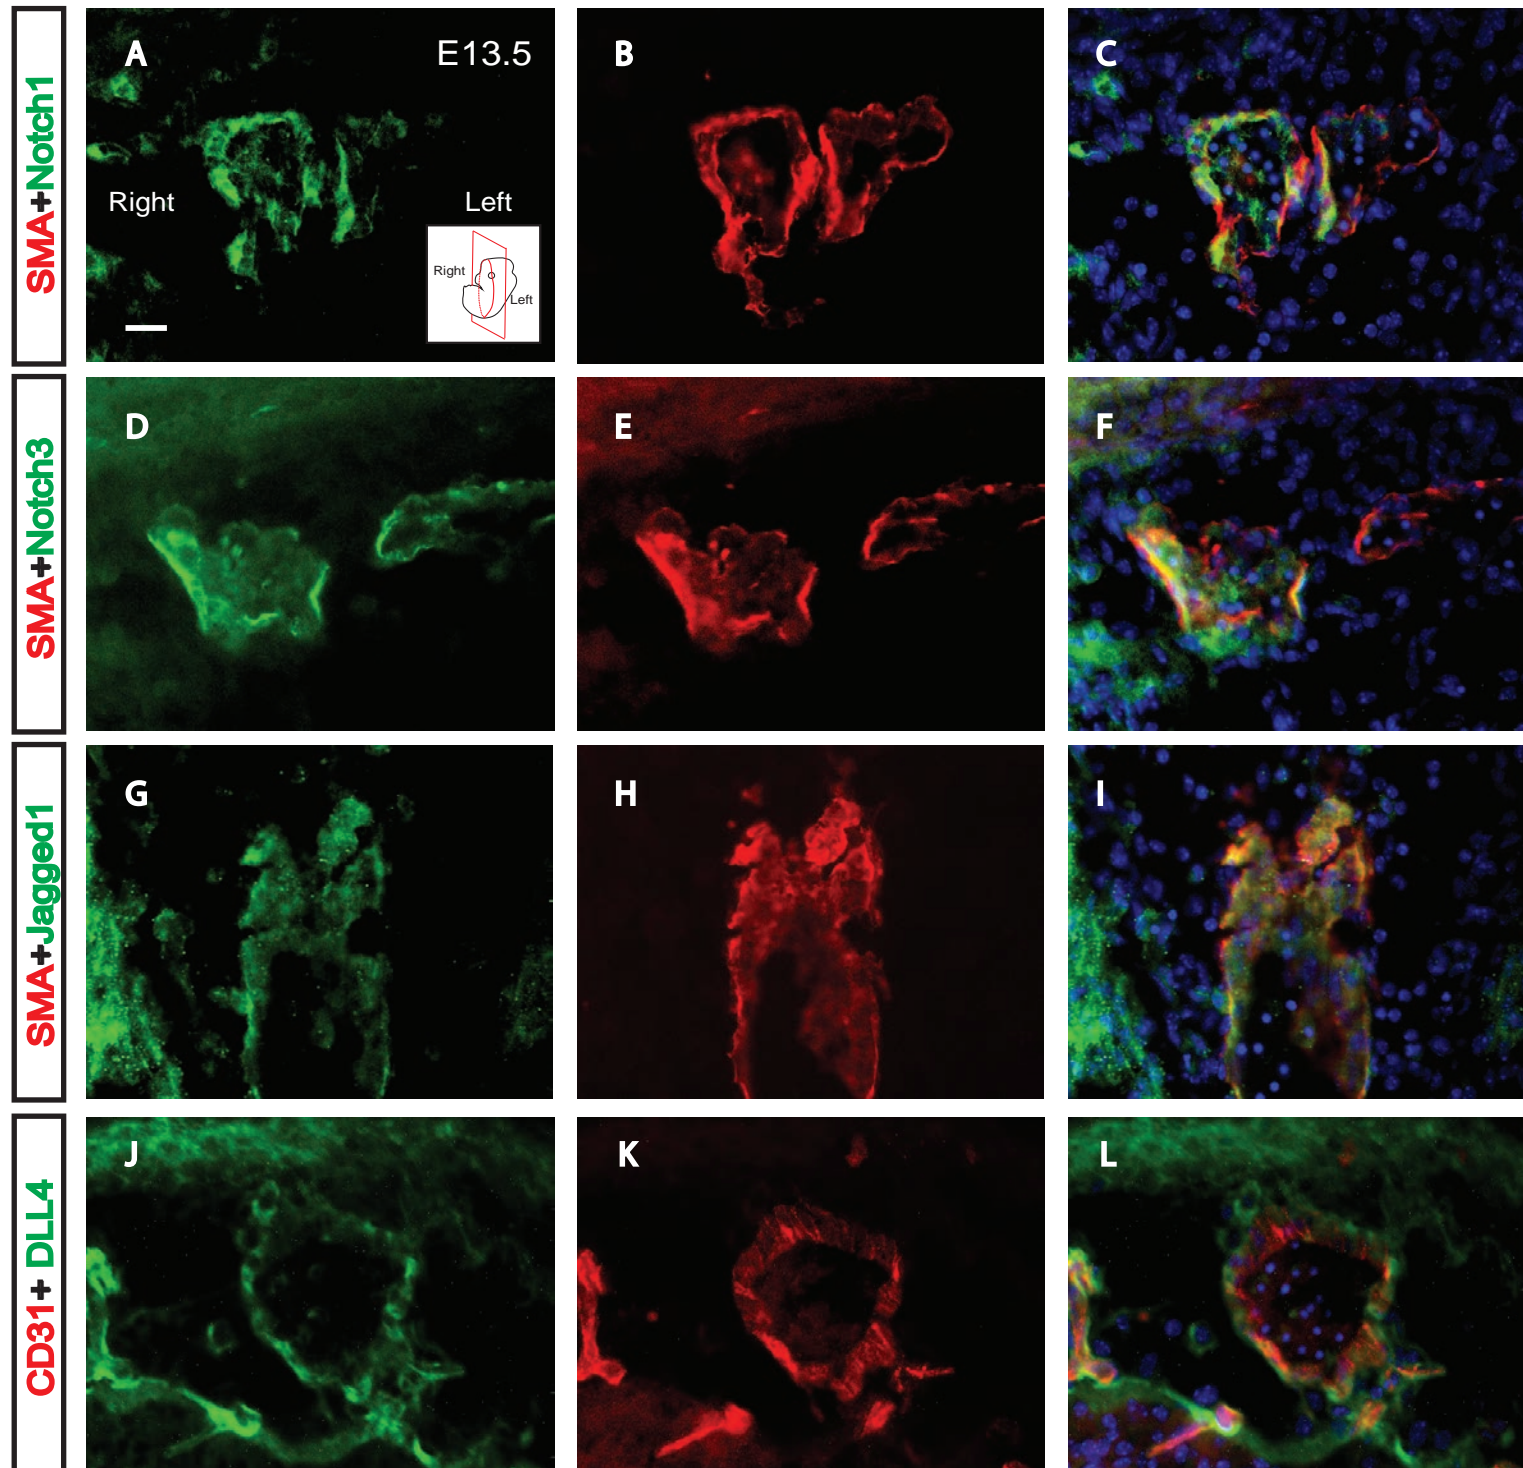

Supplement: NIHMS503020-supplement-01.pdf [file NIHMS503020-supplement-01.pdf]
